# Stability Criteria for Complex Microbial Communities

Stacey Butler<sup>1</sup>, James O'Dwyer<sup>2,3\*</sup>,

<sup>1</sup> Department of Mathematics, University of Illinois, Urbana, IL 61801, USA

<sup>2</sup> Department of Plant Biology, University of Illinois, Urbana, IL 61801, USA

<sup>3</sup> Carl R. Woese Institute for Genomic Biology, University of Illinois, Urbana, IL 61801, USA

\* jodwyer@illinois.edu

## Abstract

Competition and mutualism are inevitable processes in microbial ecology, and a central question is which and how many taxa will persist in the face of these interactions. Ecological theory has demonstrated that when direct, pairwise interactions among a group of species are too numerous, or too strong, then the coexistence of these species will be unstable to any slight perturbation. This instability worsens when mutualistic interactions complement competition. Here, we refine and to some extent overturn that understanding, by considering explicitly the resources that microbes consume and produce. In contrast to more complex organisms, microbial cells consume primarily abiotic resources, and mutualistic interactions are often mediated by these same abiotic resources through the mechanism of cross-feeding. Our model therefore considers the consumption and production of a set of abiotic resources by a group of microbial species. We show that if microbes consume, but do not produce resources, then any positive equilibrium will always be stable to small perturbations. We go on to show that in the presence of crossfeeding, stability is no longer guaranteed. However, stability still holds when mutualistic interactions are either symmetric, or sufficiently weak.

## Introduction

Early ecological intuition suggested that tightly woven networks of interactions would lead to more stable and robust communities[1, 2, 3]. But this intuition was later overthrown by the realization that large, complex, interacting systems will tend to become unstable to small perturbations once either the number or strength of interactions passes a certain threshold[4, 5]. These original analyses were based on the strength and type of interactions between pairs of species, and initially pertained to random mixtures of interaction types, including predation, competition, and mutualism. More recently, similar results were derived for purely competitive interactions among a group of species, with the same bottom line: if pairwise competitive interactions are too numerous, or too strong, then any equilibrium of coexisting, competing species will be unstable[6].

In parallel, theory had also been developed for groups of species consuming a set of distinct resources[7, 8, 9, 3, 10, 11, 12]. In these models, the resources actually being competed for are treated explicitly. Typically these models make several simplifying assumptions, including the timescales on which resources are replenished, and the way that consumer preferences differ. Some treat resources as biological organisms, with the capacity to grow and compete among themselves[7, 13], while others consider abiotic resources, which are replenished from outside the system[14]. Microbial communities composed of bacterial or archaeal cells provide an example of an ecological system where we can (almost) unambiguously separate the component parts into biological organisms and abiotic resources, where by abiotic we mean resources that are not capable of reproduction on their own. Even though a rich range of metabolites exchanged by microbial communities are of biological origin, we count these as abiotic for this reason. Direct

predatory interactions among bacteria are somewhat rare [15], while consumption and production of abiotic resources likely mediates much of microbial competition (via resource scarcity [16]) and mutualism (via crossfeeding [17]), suggesting that a consumer-producer-resource framework will provide a more general and appropriate framework for microbial interactions than direct, pairwise interactions. However, the broad-ranging properties of such large systems of consumers, producers and abiotic resources is under-explored.

With these motivations in mind, we present a model of consumers that compete for a set of dynamical, abiotic resources, governed by a set of preferences for those resources, an influx rate for resource replenishment, and a mortality rate for consumers. We will prove that any positive densities of consumers and resources can be an equilibrium solution in our model, with no finite limit to the similarity of consumers. Moreover, in contrast to results for pairwise competition, these equilibria are always stable to small perturbations. We place no specific constraint on the set of preferences of consumers for resources to obtain this result—in other words, we don't need to assume a particular functional form (neither random, modular, or highly structured in some other way). For a fixed set of preferences of consumers for resources, we also use this model to examine the range of influx and mortality rates that lead to stable coexistence. We find that species similarity does not directly govern the size of this range, thus clarifying and refining the classical expectation of limiting similarity in this context [9, 3, 18, 19]. Finally, we extend our model to include production of resources. Mutualistic pairwise interactions have been found to push communities closer to instability [6], leading to a question mark over how widespread mutualistic interactions can reasonably be in microbial communities [20]. We find a similar result in our consumer-producer-resource system, and for a range of cases bound the possible strength and prevalence of resource production. On the other hand, we find that if mutualistic interactions are completely symmetric, then stability is again guaranteed for feasible equilibria, a result at odds with earlier pairwise analyses.

## Competition for Resources

Our model for consumers and resources is defined in terms of competition for substitutable resources:

$$\begin{cases} \dot{R}_i = \rho_i - R_i \sum_j C_{ij} S_j \\ \dot{S}_i = \epsilon S_i \sum_j C_{ij}^T R_j - \mu_i S_i. \end{cases} \quad (1)$$

Here the  $R_i$  represent a set of  $N$  resources,  $S_i$  represent a set of  $N$  consumers, while  $C_{ij}$  is the rate of consumption of resource  $i$  by consumer  $j$ , per unit consumer and resource.  $\rho_i$  and  $\mu_j$  represent influx rates for resource  $i$  and mortality rate for consumer  $j$ , respectively, while  $\epsilon$  is a free parameter characterizing the efficiency with which consumers convert resources into biomass. We could include an outflow, or leaching rate  $-\eta_i R_i$  for resources [14], though here we assume that consumption is sufficiently fast that this rate will be negligible (and moreover our results below for local stability are unchanged even when this outflow is incorporated). We also note that we could straightforwardly generalize these equations to include more general functional responses [21] (for example it would be perfectly reasonable to consider a Monod-type form for the uptake rate of resources). However, we consider solely the mass action terms above in the spirit of the vast range of Lotka-Volterra analyses undertaken for pairwise interactions: if we can understand the properties of these idealized communities, we then have a baseline on which to layer further biological complexity.

Finally, we note that this is a model for substitutable resources, and while there may be families of resources which *are* to some extent substitutable (for example different carbon sources) the general picture for microbial consumers is likely colimitation by multiple, qualitatively different types of resource [14, 22, 23]. In some cases Liebig's law of the minimum may be appropriate [24], and in others there may be multiplicative colimitation by multiple resources [23], or perhaps still more general functional dependencies [25]. Our analysis of substitutable resource consumption and production here may be seen as a starting point for these more general cases.

The consumer-resource system represented by (1) has a set of equilibrium solutions

$$\begin{cases} \vec{R}^* = C^{-T} \frac{1}{\epsilon} (\vec{\mu}) \\ \vec{S}^* = [(\vec{R}_{diag}^*)C]^{-1} \vec{\rho}. \end{cases} \quad (2)$$

The only biologically-reasonable solutions are those with positive densities of consumers and resources, known as feasible solutions [26]. For our model, for any positive  $\{\vec{R}^*, \vec{S}^*\}$ , there are always positive influx and mortality rates  $\vec{\rho}$  and  $\vec{\mu}$  that result in these feasible solutions, independent of the form of the matrix  $C$  (our Supplementary Information section 1 details the proof of this statement). In other words, any feasible set of densities can be a solution of our equations, for an appropriate set of influx and mortality rates defining the environmental context. We now present two results. First, we will show that feasible solutions are stable to small perturbations. Then we will consider what range of parameter values for  $\rho_i$  and  $\mu_i$  will lead to such feasible solutions.

## Feasibility guarantees Local Stability

We now demonstrate a departure from earlier results for pairwise competition between species[6]: any and all of these feasible solutions are guaranteed to be stable to small perturbations. The Jacobian matrix corresponding to the equilibrium solutions given by (2) is

$$L = \left[ \begin{array}{c|c} [-C\vec{S}^*]_{diag} & -[\vec{R}_{diag}^*]C \\ \hline \epsilon[\vec{S}_{diag}^*]C^T & 0 \end{array} \right] \quad (3)$$

where  $\vec{R}_{diag}^*$  denotes a diagonal matrix with the components of  $\vec{R}^*$  along the diagonal. If all the eigenvalues of this Jacobian are negative, then this equilibrium is locally stable. In our Supplementary section 2, we show that for a feasible solution (i.e. an equilibrium with positive abundances) this equilibrium is guaranteed to be stable to local perturbations, independent of the form of the matrix  $C$ , implying that competition alone in systems of consumers and resources is never sufficient to lead to an unstable, feasible equilibrium. We illustrate this (along with the full distribution of eigenvalues) for some example cases in Fig. 1. Finally, we note that including the leaching or degradation of resources, which would ensure that resources would saturate even in the absence of consumers, does not change the form of this matrix or the result that feasibility implies stability.

This mirrors earlier results for the stability of systems of biotic consumers and biotic resources [13, 27], where resources themselves can grow and compete with each other. On the other hand, such examples are just one particular prescription for a set of Lotka-Volterra interactions, and therefore a priori no more valid than the randomly-generated Lotka-Volterra interactions that *do* lead to unstable, feasible equilibria. But for systems with a clear distinction between abiotic resources and biological consumers our result applies unambiguously and generally.

## Structural Stability

We now ask what range of values of  $\vec{\mu}$  and  $\vec{\rho}$  will lead to positive, feasible solutions for consumer and resource densities, for a given fixed set of preferences for resources,  $C$ . The volume of this parameter space is known as the structural stability of a given system[28], and biologically it quantifies the robustness of equilibria. Suppose that the environmental context in which a group of species coexist shifts over time, and this shift affects  $\vec{\mu}$  and  $\vec{\rho}$ . Then structural stability characterizes how likely it will be that the same species will continue to coexist in this new environmental context. In our Supplementary section 3, we derive new

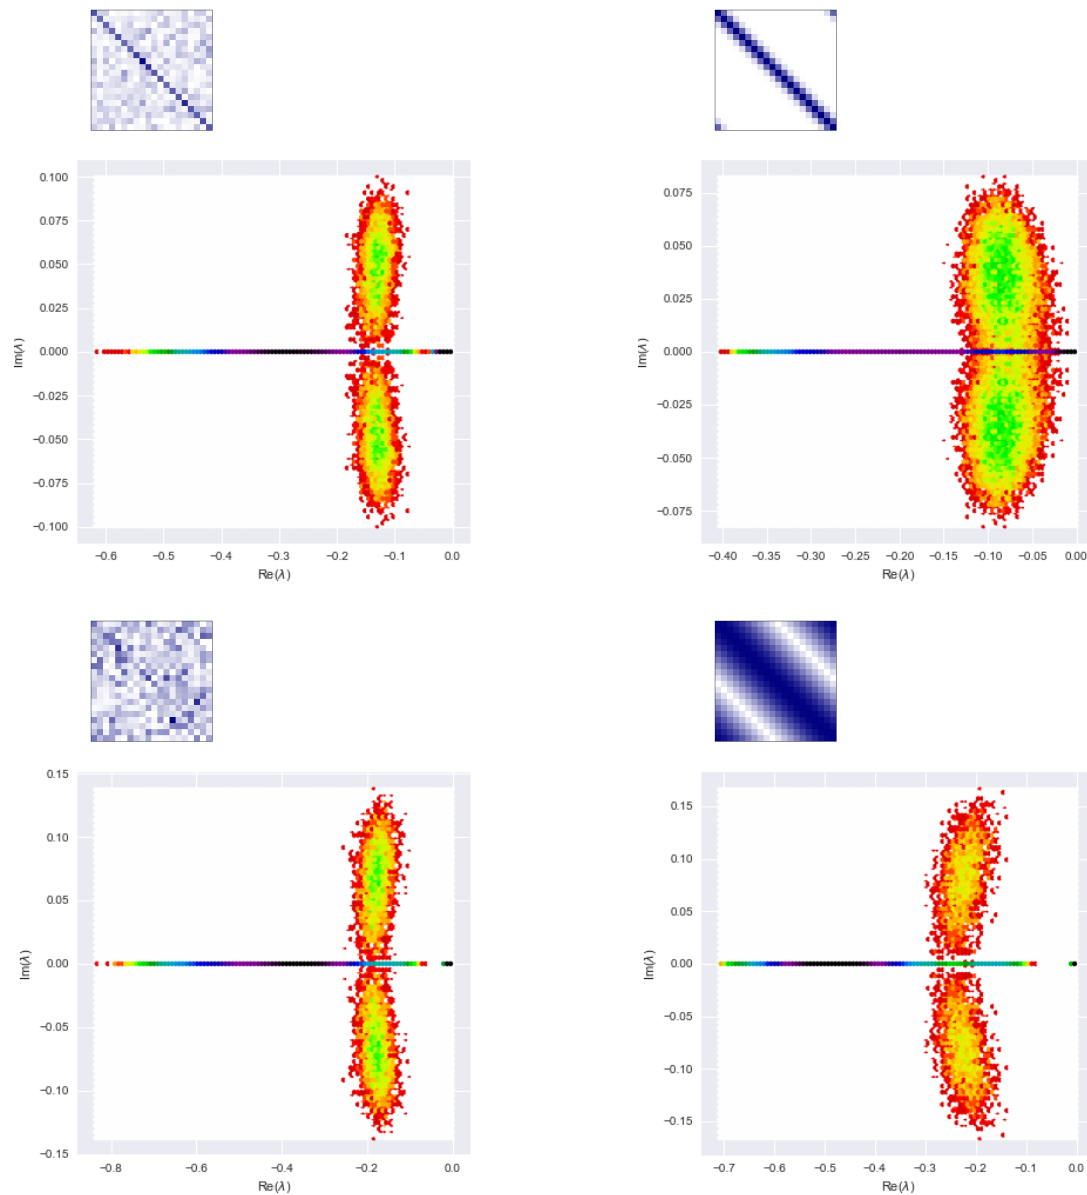

**Figure 1: The local stability guarantee.** We show four examples demonstrating feasible solutions of (1) that are stable to small perturbations. Plots show the density (colored from red to blue) of eigenvalues for the Jacobian matrix at this equilibrium, defined using a fixed matrix of consumer preferences. The form of the consumer preferences is shown inset in blue. Each plot is obtained over multiple random draw for consumer and resource densities, drawn from a uniform distribution. In the left hand panels, we consider a gradient from near-specialism, where each consumer has a favourite resource (but there are weak, randomly-drawn off-diagonal interactions), to near-generalism, where the off-diagonal preferences are stronger than the specialism. In the right hand panels, we show a similar gradient of near-specialism to near-generalism, but where the resource preferences follow a smooth curve away from the preferred resource for each species. In all cases, our theorem for local stability holds: the real parts of all eigenvalues of the Jacobian matrix are always negative. We also note the similarity in the 'dragonfly' shape for this distribution across all cases, contrasting with the classic circle (or elliptical) distributions for eigenvalues found in the case of pairwise interactions[6].

results for the volume of  $\vec{\mu}$  and  $\vec{\rho}$  values that will lead to feasible solutions, for a given matrix  $C$ . For example, in the case of mortality rates, this volume is given by:

$$V_{\mu} = 2 \frac{|\det C|}{\pi^{\frac{n}{2}}} \int_{\mathbb{R}_+^n} e^{-\langle \xi, C^T C \xi \rangle} d\xi \quad (4)$$

where  $\det C$  is the determinant of the matrix  $C$ , and the angled brackets define the usual dot product. The most important message here is that this determinant does not depend in a simple way on the pairwise similarity of any two species, defined by their overlap in resource preferences.

On the other hand, we can still ask how this volume changes as we make consumers more or less similar in terms of the resources they use, represented mathematically by the similarity of the columns of  $C$ . In the special case where all species begin equally similar, then a uniform decrease in their similarity leads to a larger volume for the parameter space, and greater structural stability. This is in agreement with the ecological intuition that it is ‘easier’ for more dissimilar species to coexist. However, this is not the general case. Independent of the size of the system, there are some contexts where a decrease in species similarity will lead to less, not greater, structural stability. Fig. 2 shows a specific (but far from unique) example. In summary, we have provided a general result for the structural stability of systems of consumers and abiotic resources, and find that it does not depend (in general) in a simple way on species similarity expressed in terms of consumption preferences.

## Mutualistic Interactions

Microbial taxa that can both consume and also produce resources have the potential for mutualistic, syntrophic interactions[6, 20, 29]. For this reason we now consider a more general set of dynamics for species and resources, which includes a matrix,  $C$ , representing the resource use of the consumers and a matrix,  $P$ , representing the production of resources by the consumers:

$$\begin{cases} \dot{R}_i = \rho_i - R_i \sum_j C_{ij} S_j + \sum_j P_{ij} S_j \\ \dot{S}_i = \epsilon S_i \sum_j C_{ij}^T R_j - S_i \sum_j P_{ij}^T - \mu_i S_i \end{cases} \quad (5)$$

Our approach again makes use of mass action principles, and we note that we consider production of resources to remove biomass from the consumer density, meaning that production terms appear in both equations. We have also chosen a form for production that depends solely on the density of species that are present in the system, and not on what resources those species are using to grow. This may be a reasonable approximation for some processes, for example the production of various intermediates of the TCA cycle, the production of which are not substrate-dependent[30]. But in other cases, we may need to allow for a more general form for production that depends both on the species that are present, *and* the specific resources they are consuming.

We now consider the properties of the equilibrium solutions

$$\begin{cases} \vec{R}^* = C^{-T} \frac{1}{\epsilon} (P^T \vec{1} + \vec{\mu}) \\ \vec{S}^* = [(R_{diag}^*)C - P]^{-1} \vec{\rho}. \end{cases} \quad (6)$$

which have a correspondingly more general Jacobian matrix

$$L = \left[ \begin{array}{c|c} [-CS^*]_{diag} & -[R_{diag}^*]C + P \\ \hline \epsilon[S_{diag}^*]C^T & 0 \end{array} \right] \quad (7)$$

For this system, when the production matrix is nonzero, we do not know in general what additional constraints beyond feasibility are needed to ensure a stable equilibrium. However, we present evidence below

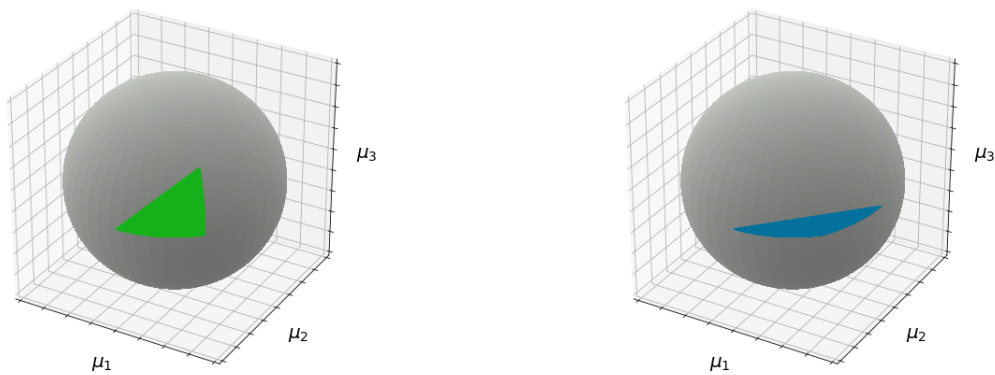

**Figure 2: Non-monotonic changes in structural stability with species similarity.** The volume of the set of mortality rates leading to feasible densities for the resources,  $R^*$ , can decrease even when species similarity is decreased. Here, we show an example in three dimensions, where each axis represents one of the three mortality rates,  $\mu_i$ , and the volume is a kind of wedge extending from the origin outwards. The measure,  $V_\mu$ , of the size of this volume is then equivalent to the area (colored green or blue) of a triangle on the surface of the unit sphere, where the dissimilarity of each pair of species is proportional to the length of one of the triangle's sides. On the left, this volume is shown for the particular  $3 \times 3$  matrix  $C^T$  detailed in our Supplementary Information, and is colored green. When the angle between one pair of column vectors is increased while the other angles are unchanged, we get the volume shown on the right hand side. The resulting volume decreases in size, despite the average similarity of these three species having decreased.

that suggests production rates must in general be bounded for feasible solutions to also be locally stable. Conversely, we also show that there are some cases in which production rates can be arbitrarily large and local stability will still hold.

## Feasibility and Reciprocity guarantee Local Stability

To explore this, we consider the case of specialist consumers,  $C = cI$ , i.e. where each consumer specializes on just a single resource. We also tune the influx and mortality rates so that equilibrium species abundances and resource densities take the simplified form  $\vec{S}^* = s\vec{1}$ , and  $\vec{R}^* = r\vec{1}$ , for positive real values  $s$  and  $r$ . While this may seem restrictive, in that competition is solely intraspecific, we put no other restrictions on the production rates,  $P_{ij}$ . Hence, we can think of this as close to the most general case of purely mutualistic interspecific interactions. In our Supplementary section 4, we express constraints on the production matrix to ensure that it is possible to obtain these feasible solutions. We then go on to prove that a sufficient (though not necessary) condition for feasible solutions to also be stable is:

$$\left( \sum_{j \neq i} P_{ij} \right)^2 < \frac{cs}{\epsilon} (cr - P_{ii} - \frac{cs}{4\epsilon}) \quad (8)$$

This result is straightforward to interpret. Suppose that consumers do not produce any of the resource that they specialize on, so that  $P_{ii}$  vanishes. Then this result constrains a combination of the strength and prevalence of production of the ‘off-diagonal’ resources for each species in terms of consumption rate,  $c$ , conversion efficiency,  $\epsilon$ , and the equilibrium abundances and densities  $s$  and  $r$  of consumers and resources.

These results are reminiscent of constraints on stability for randomly-drawn, pairwise interactions between species. In that case, mutualistic interactions tend to be more destabilizing than competitive interactions, as we have found here, though here we are not limited to a particular form for  $P$  to obtain our sufficient condition for stability. Are we then merely recapitulating results that are qualitatively already understood via pairwise interactions? In fact, our current analysis offers some new insights. While sufficient, there are cases where the bound above is not necessary for stability. One example is when production vanishes altogether, and we are back to our earlier, more general result that feasibility always implies stability. A more non-trivial example is when the production matrix is purely symmetric. In this case, feasibility alone is sufficient to guarantee local stability of the equilibrium solution, with no further restrictions on production. We call this case reciprocal, because symmetry of  $P$  ensures that each (specialized) consumer gives exactly as much of each other consumer’s preferred resource as they receive from that consumer. That the asymmetry of mutualistic interactions, rather than purely their strength or number, may be key to destabilizing communities demonstrates again that there are some important insights to be gained from the analysis of this consumer-producer-resource community that are not clear from the pairwise analysis. Fig.3 demonstrates this for some particular examples.

## Discussion

We have modeled the interactions among biological populations that can consume, produce, and reproduce; and abiotic resources that can be introduced, leached, consumed, or produced, but do not reproduce. Perhaps more than any other biological system, this clear division is likely to be a good approximation in bacterial and archaeal communities, and may provide a more accurate description than modeling pairwise competitive and mutualistic interactions, which ignore the dynamics of resources. We revisit a series of classic analyses for ecological communities in this framework, and identify important differences with earlier theoretical results arising from direct, pairwise interactions. First, we find that any positive densities



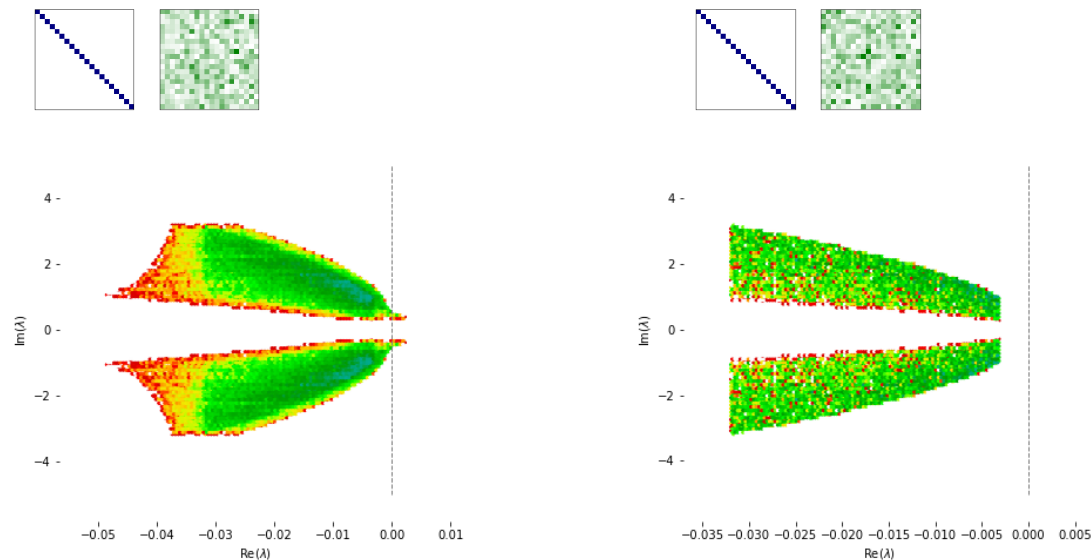

**Figure 3: Feasibility and Reciprocity guarantee Local Stability.** We show two examples demonstrating feasible solutions of (5). Plots show the density (colored from red to blue) of eigenvalues for the Jacobian matrix at this equilibrium, defined using a fixed, diagonal matrix of consumer preferences (shown inset in blue) and a fixed, more general matrix of production rates (inset in green). Each plot is obtained over multiple random draws for consumer and resource densities  $s$  and  $r$ , defined in the main text, and drawn from a uniform distribution (subject to the constraints necessary to ensure that these densities can be obtained with positive influx and mortality rates  $\rho$  and  $\mu$ ). In the left hand panel, we consider a random set of production rates, which does not satisfy the bound necessary to guarantee stability, and indeed we see that there are some positive eigenvalues of the Jacobian matrix, to the right of the black dashed line. In the right hand panel, we show a similar case but where we impose that the production matrix  $P$  is symmetric, meaning that each consumer gets as much of its favored resource as it gives. Even though the production matrix looks ‘similar’ to the naked eye in each case, this symmetry in the latter example is enough to guarantee local stability, with the largest eigenvalue bounded away from zero by a gap related to the consumer abundances.



for consumers and resources can be an equilibrium solution to our equations, given an appropriate environmental context. We also find that these feasible solutions are always locally stable, unlike the classical results for pairwise interactions between species, which allow for unstable, feasible solutions[5, 6] unless particular restrictions are placed on species interactions[31, 26].

For systems of consumers and resources, we derived results for structural stability given a set of consumer preferences, a measure of robustness to environmental changes. In contrast to the classical expectation, we showed that structural stability is not guaranteed to increase as species become more dissimilar in terms of their resource preferences, echoing other recent work showing the complexity of structural stability for direct, pairwise interactions [31, 26]. Our results clarify how this more general picture plays out when resource dynamics are modeled explicitly. Finally, we extended our approach to include production of resources, which allows for mutualistic interactions via crossfeeding, where one species may produce a resource that another needs. In this case, we find that when production is too large, feasible solutions no longer guarantee local stability. But we also find that when mutualistic interactions are precisely balanced, that stability again is guaranteed. This suggests that it is the asymmetry in mutualistic interactions rather than their strength that may be the driver of instability.

There are several opportunities for the extension of our results: including the consideration of more complex functional responses[21, 32] allowing for the saturation of resource usage or multi-way interactions; and demographic or environmental stochasticity with (for example) their effects on local extirpation of resources or consumers[33]. We also do not rule out that direct, pairwise interactions are likely to play a role (perhaps as an approximation to antagonistic interactions mediated by antibiotic production, or even in rare cases direct cannibalism of microbial cells by each other). It is also clear that microbial cells themselves interact with other biological organisms, and can be consumed. Still, our results indicate a more general lesson. In any complex ecological system we inevitably draw lines around what we choose to model, and what we leave out. Our results here show that explicitly modeling the resources that mediate interactions between biological organisms can significantly alter our conclusions.

## A Feasibility of Solutions

For any solution for  $\vec{R}^*$  and  $\vec{S}^*$  with positive consumer and resource densities, we can identify positive-valued influx and mortality rates that will lead to these solutions as follows:

$$\begin{cases} \vec{\mu} = \epsilon_{diag} C^T \vec{R}^* \\ \vec{\rho} = \vec{R}_{diag}^* C \vec{S}^* \end{cases} \quad (9)$$

Because  $C$  is positive, any positive  $\vec{R}^*$  will result in  $\vec{\mu} > 0$ . And if  $\vec{S}^*$  is positive,  $\vec{\rho} > 0$ . Thus for appropriate choice of parameters, any positive  $\{\vec{R}^*, \vec{S}^*\}$  can be found as a solution to Eq. (1) in the main text.

## B Stability of Feasible Equilibria

The Jacobian matrix corresponding to the equilibrium solutions given by Eq. (2) in the main text is

$$L = \left[ \begin{array}{c|c} [-C\vec{S}^*]_{diag} & -[\vec{R}_{diag}^*]C \\ \hline \epsilon[\vec{S}_{diag}^*]C^T & 0 \end{array} \right] \quad (10)$$

If all the real parts of the eigenvalues of this Jacobian are negative, then this equilibrium is locally stable. To compute these eigenvalues, we first note that the eigenvalue equation  $\det(L - \lambda I) = 0$  is given by

$$\det(L - \lambda I) = \det \left( \left[ \begin{array}{c|c} [-C\vec{S}^*]_{diag} - \lambda I & -[\vec{R}_{diag}^*]C \\ \hline \epsilon[\vec{S}_{diag}^*]C^T & -\lambda I \end{array} \right] \right) = 0. \quad (11)$$

Next, we note that  $[-C\vec{S}^*]_{diag} - \lambda I$  is invertible, so long as  $\lambda$  is not an eigenvalue of  $[-C\vec{S}^*]_{diag}$ . If it is an eigenvalue, then for positive  $C$  and  $\vec{S}^*$ ,  $\lambda < 0$ . On the other hand, if  $\lambda$  is not an eigenvalue of  $[-C\vec{S}^*]_{diag}$  then

$$\det(L - \lambda I) = \det([-C\vec{S}^*]_{diag} - \lambda I) \times \det(-\lambda I - \epsilon[\vec{S}^*_{diag}]C^T[-C\vec{S}^*]_{diag} - \lambda I)^{-1}[-\vec{R}^*_{diag}C]$$

Defining  $D_1 = \epsilon[\vec{S}^*_{diag}]$ ,  $D_2 = [-C\vec{S}^*]_{diag} - \lambda I$  and  $k = \det([-C\vec{S}^*]_{diag} - \lambda I)$  then

$$\begin{aligned} \det(L - \lambda I) &= k \det(-\lambda I - D_1 C^T D_2 C) \\ &= k \det(-\lambda I - [\sqrt{D_2} C \sqrt{D_1}]^T [\sqrt{D_2} C \sqrt{D_1}]) \end{aligned} \quad (12)$$

We now assume  $\lambda$  is a positive real number. Then so long as  $D_1, D_2$  and  $C$  are invertible (true by previous assumption and with  $\vec{S}^*, \vec{R}^* > 0$ ), then  $[\sqrt{D_2} C \sqrt{D_1}]^T [\sqrt{D_2} C \sqrt{D_1}]$  is positive definite and thus  $\lambda < 0$ , contradicting the assumption. Biologically, our assumption that  $C$  is invertible only rules out essentially trivial cases, where e.g. a resource (or a linear combination of resources) can be removed from the system altogether, or the resource preferences of two species overlap identically.

More generally, assume that  $\lambda = c + di$  is complex with positive real part  $c > 0$ . Then we can choose the  $j$ th diagonal entry of  $\sqrt{D_2}$  to be written as  $a_j + b_j i$  where  $|a_j| > |b_j|$  for all  $j$ , because each of the entries of the diagonal matrix  $D_2$  has positive real part. Now, let  $\sqrt{D_2} C \sqrt{D_1} = A + Bi$  with  $A = \vec{a}_{diag} C \sqrt{D_1}$  and  $B = \vec{b}_{diag} C \sqrt{D_1}$ . Let  $\vec{x}$  be an eigenvector associated with the eigenvalue  $-\lambda$  of  $[A + Bi]^T [A + Bi]$ . Then  $\vec{x}^* [A + Bi]^T [A + Bi] \vec{x}$  should have negative real part, however

$$\vec{x}^* [A + Bi]^T [A + Bi] \vec{x} = \vec{x}^* A^T A \vec{x} - \vec{x}^* B^T B \vec{x} + [\vec{x}^* A^T B \vec{x} + \vec{x}^* B^T A \vec{x}]i \quad (13)$$

and the real part of  $\vec{x}^* [A + Bi]^T [A + Bi] \vec{x}$  is

$$\vec{x}^* A^T A \vec{x} - \vec{x}^* B^T B \vec{x} \quad (14)$$

and because

$$A\vec{x} = \vec{a}_{diag} C \sqrt{D_1} \vec{x} = \vec{a}_{diag} \vec{r} \quad (15)$$

and

$$B\vec{x} = \vec{b}_{diag} C \sqrt{D_1} \vec{x} = \vec{b}_{diag} \vec{r} \quad (16)$$

where  $\vec{r} = C \sqrt{D_1} \vec{x}$ , we have that  $\vec{x}^* A^T A \vec{x} - \vec{x}^* B^T B \vec{x}$  is positive. Therefore we contradict our initial assumption that  $\lambda$  has positive real part.

## C Structural Stability

Feasible solutions for this system correspond to positive values for  $\vec{R}^*$  and  $\vec{S}^*$ . The size of  $\mu$ -space that lead to such positive solutions then depends on  $C$ , while similarly the size of  $\rho$ -space depends on  $C^T$ . The size of the parameter space depends on  $\det(C)$  which considers the relationship among all consumers' resource use vectors and so it is more than just pairwise similarity that is important for the size of the parameter spaces [31, 34]. This can be seen from mathematical expressions for these volumes, which are given by [34]

$$V_\mu = 2 \frac{\sqrt{\det M_\mu}}{\pi^{\frac{n}{2}}} \int_{\mathbb{R}_+^n} e^{-\langle \xi, M_\mu \xi \rangle} d\xi \quad (17)$$

and

$$V_\rho = 2 \frac{\sqrt{\det M_\rho}}{\pi^{\frac{n}{2}}} \int_{\mathbb{R}_+^n} e^{-\langle \xi, M_\rho \xi \rangle} d\xi. \quad (18)$$

Here,  $M_\mu = \hat{C}\hat{C}^T$  and the columns of  $\hat{C}^T$  are the normalized columns of  $C^T$  and  $M_\rho = \tilde{C}^T\tilde{C}$  and the columns of  $\tilde{C}$  are the normalized columns of  $R^*C$ . We note that while  $V_\mu$  depends only on the properties of the consumer preference matrix,  $V_\rho$  depends also on  $\vec{R}^*$ , which in turn depends on a specific choice of  $\vec{\mu}$ . In other words, the volume  $V_\rho$  changes with choice of  $\vec{\mu}$ .

## C.1 Uniform Similarity and Structural Stability

In the special case where all angles between pairs of column vectors are initially the same, a uniform increase in all angles does lead to a larger volume for the parameter space. To see this for a system with  $N$  consumers, let  $a = \cos(\theta)$  where  $\theta$  represents the angle between each pair of normalized column vectors of  $C$ . The determinant of  $M$  is given by

$$\begin{aligned} \det(M) &= \det \left( \begin{bmatrix} 1 & a & \cdots & a \\ a & 1 & \ddots & \vdots \\ \vdots & \ddots & \ddots & a \\ a & \cdots & a & 1 \end{bmatrix} \right) \\ &= (1-a)^{n-1}(1+(n-1)a) \end{aligned} \quad (19)$$

Thus if the angle,  $\theta$ , increases, then  $a = \cos(\theta)$  decreases and  $\det(M)$  will increase.

## C.2 Decreasing similarity can lead to decreasing structural stability

However, it is not always the case that increasing angles between one or more species will increase  $V_\mu$  or  $V_\rho$ . We now consider the following example for  $N = 3$ , shown graphically in Fig. 2. Suppose initially that consumer preferences are given by the matrix

$$C^T = \begin{bmatrix} 1 & \frac{1}{\sqrt{2}} & \frac{1}{\sqrt{3}} \\ 0 & \frac{1}{\sqrt{2}} & \frac{1}{\sqrt{3}} \\ 0 & 0 & \frac{1}{\sqrt{3}} \end{bmatrix}, \quad (20)$$

while after shifting species preferences we have the new matrix

$$\tilde{C}^T = \begin{bmatrix} 1 & \frac{1}{\sqrt{2}} & a \\ 0 & \frac{1}{\sqrt{2}} & b \\ 0 & 0 & c \end{bmatrix}, \quad (21)$$

where  $a = \frac{1}{\sqrt{3}} - \frac{1}{4}\sqrt{\frac{194}{75}}$ ,  $b = \frac{1}{\sqrt{3}} + \frac{1}{4}\sqrt{\frac{194}{75}}$ , and  $c = \frac{1}{10}$ . The angles between the column pairs for  $C^T$  are  $\{\theta_{12} = \frac{\pi}{4}, \theta_{13} \approx .304\pi, \theta_{23} \approx .196\pi\}$  and the angles between the column pairs for  $\tilde{C}^T$  are  $\{\tilde{\theta}_{12} = \frac{\pi}{4}, \tilde{\theta}_{13} \approx .444\pi, \tilde{\theta}_{23} \approx .196\pi\}$ . So that  $\theta_{12} = \tilde{\theta}_{12}$ ,  $\theta_{13} < \tilde{\theta}_{13}$  and  $\theta_{23} = \tilde{\theta}_{23}$ . The volumes of the associated parameter spaces are  $V_\mu \approx .0417$  and  $\tilde{V}_\mu \approx .008$  for  $C^T$  and  $\tilde{C}^T$  respectively. We note that these are just exemplars, and this counterintuitive result can be found for many different contexts, and is not limited to three species.

## D Local Stability for Systems of Consumers, Producers and Resources

For the case of specialized consumers and equilibria with equal abundances for species and equal densities for all resources, the equations for equilibrium abundances are (from Eq.(6) in the main text)

$$\begin{cases} r\vec{1} = \frac{1}{c\epsilon}(P^T\vec{1} + \vec{\mu}) \\ s\vec{1} = [crI - P]^{-1}\vec{\rho}. \end{cases} \quad (22)$$

Then, solving for the parameters  $\vec{\mu}$  and  $\vec{\rho}$  we have

$$\begin{cases} \vec{\mu} = cr\epsilon\vec{1} - P^T\vec{1} \\ \vec{\rho} = s[crI - P]\vec{1} \end{cases} \quad (23)$$

To ensure that positive resource density (i.e. positive  $r$ ) can be obtained by positive rates,  $\vec{\mu}$ , we need that  $cr\epsilon > \sum_j P_{ij}^T$ , for all  $i$ . Similarly, to ensure that we obtain positive values for  $s$  from positive  $\rho$ , we need that  $cr > \sum_j P_{ij}$  for all  $i$ . In summary, not *all* possible values of consumer and resource density (i.e. not all positive values of  $r$  and  $s$ ) can be obtained as solutions of these equations, conditioning on positive influx and mortality rates. I.e., unlike the case of  $P = 0$ , there are now constraints for what subsets of feasible solutions are possible.

From Eq.(7) in the main text, we then find the Jacobian reduces to the form:

$$\tilde{L} = \left[ \begin{array}{c|c} -csI & P - crI \\ \hline \epsilon csI & 0 \end{array} \right] \quad (24)$$

We let  $\lambda$  represent an eigenvalue of  $\tilde{L}$ . Then,  $\gamma = \frac{\lambda(\lambda+cs)}{\epsilon cs} + cr$  is an eigenvalue of  $P$ . Hence,

$$\lambda = \frac{-cs}{2} \pm \frac{1}{2} \sqrt{(cs)^2 - 4\epsilon cs(cr - \gamma)}$$

When all  $Re(\lambda) < 0$  the equilibria above are stable to local perturbations.

### D.1 Symmetric $P$

We first consider a special case: where all  $\gamma$  are all real. An example of this occurs when  $P$  is symmetric, when (as discussed in the main text) each consumer species will get as much of its preferred resource as it gives to other species (of their preferred resources). In this case, if also all  $\gamma < cr$ , then all  $\lambda$  will be  $< 0$  and the equilibrium is locally stable. Using Gershgorin's theorem [35], this will be guaranteed when

$$cr > \sum_j P_{ij} \quad \forall i$$

In fact, this is the same as the criterion above that ensures  $\vec{S}^* > 0$ . So we conclude that feasibility and reciprocity together imply local stability, visualized in an example case of Figure 3 in the main text.

## D.2 More General $P$

To find necessary and sufficient conditions on  $\gamma$  ensuring this for non-symmetric  $P$ , first let  $\hat{\gamma} = |\hat{\gamma}|e^{i\theta} = cs - 4\epsilon(cr - \gamma)$ . Then we want

$$\begin{aligned} \operatorname{Re}(\sqrt{\hat{\gamma}}) &< \sqrt{cs} \\ \sqrt{|\hat{\gamma}|} \cos \frac{\theta}{2} &< \sqrt{cs} \\ |\hat{\gamma}| \left( \frac{1 + \cos \theta}{2} \right) &< cs \\ |\hat{\gamma}| + \operatorname{Re}(\hat{\gamma}) &< 2cs \end{aligned} \quad (25)$$

or equivalently

$$\epsilon(\operatorname{Im}(\gamma))^2 < cs(cr - \operatorname{Re}(\gamma)). \quad (26)$$

Can we reexpress this in terms of direct criteria for  $P$  that will guarantee stability? Again using Gershgorin's theorem [35], for each eigenvalue,  $\gamma$ , of  $P$  we know that for some  $i$

$$|\gamma - P_{ii}| < \sum_{j \neq i} P_{ij} \quad (27)$$

or equivalently:

$$(\operatorname{Im}(\gamma))^2 < -(\operatorname{Re}(\gamma))^2 + 2P_{ii}\operatorname{Re}(\gamma) + \left( \sum_{j \neq i} P_{ij} \right)^2 - (P_{ii})^2 \quad (28)$$

We can now rewrite our criteria for local stability as:

$$\epsilon(-(\operatorname{Re}(\gamma))^2 + 2P_{ii}\operatorname{Re}(\gamma) + \left( \sum_{j \neq i} P_{ij} \right)^2 - (P_{ii})^2) < cs(cr - \operatorname{Re}(\gamma)) \quad (29)$$

Rearranging terms and maximizing the quadratic in  $\operatorname{Re}(\gamma)$  gives

$$\left( \sum_{j \neq i} P_{ij} \right)^2 < \frac{cs}{\epsilon} \left( cr - P_{ii} - \frac{cs}{4\epsilon} \right) \quad (30)$$

which is sufficient for stability when it holds for all  $i$ .

## Acknowledgments

J.O.D. acknowledges the Simons Foundation Grant #376199, McDonnell Foundation Grant #220020439, NSF #DEB1557192

## References

- [1] MacArthur R. Fluctuations of animal populations and a measure of community stability. *ecology*. 1955;36(3):533–536.
- [2] Elton CS. The ecology of invasions by animals and plants. University of Chicago Press; 1958.

- [3] May R. *Stability and Complexity in Model Ecosystems* Princeton University Press Princeton Google Scholar. 1973;.
- [4] Gardner MR, Ashby WR. Connectance of large dynamic (cybernetic) systems: critical values for stability. *Nature*. 1970;228(5273):784–784.
- [5] May RM. Will a large complex system be stable? *Nature*. 1972;238(5364):413–414.
- [6] Allesina S, Tang S. Stability criteria for complex ecosystems. *Nature*. 2012;483:205–208.
- [7] MacArthur R, Levins R. The limiting similarity, convergence, and divergence of coexisting species. *American naturalist*. 1967; p. 377–385.
- [8] MacArthur R. Species packing and competitive equilibrium for many species. *Theoretical population biology*. 1970;1(1):1–11.
- [9] May RM, MacArthur RH. Niche overlap as a function of environmental variability. *Proceedings of the National Academy of Sciences*. 1972;69(5):1109–1113.
- [10] Abrams P. The Theory of Limiting Similarity. *Annual Review of Ecology and Systematics*. 1983;14(1):359–376.
- [11] Chesson P. MacArthur's consumer-resource model. *Theoretical Population Biology*. 1990;37(1):26–38.
- [12] Chesson P. Mechanisms of maintenance of species diversity. *Annual Review of Ecology and Systematics*. 2000;31:343–366.
- [13] Case TJ, Casten RG. Global stability and multiple domains of attraction in ecological systems. *The American Naturalist*. 1979;113(5):705–714.
- [14] Tilman D. Resources: a graphical-mechanistic approach to competition and predation. *The American Naturalist*. 1980;116(3):362–393.
- [15] Rendulic S, Jagtap P, Rosinus A, Eppinger M, Baar C, Lanz C, et al. A predator unmasked: life cycle of *Bdellovibrio bacteriovorus* from a genomic perspective. *Science*. 2004;303(5658):689–692.
- [16] Ghoul M, Mitri S. The ecology and evolution of microbial competition. *Trends in microbiology*. 2016;24(10):833–845.
- [17] Pfeiffer T, Bonhoeffer S. Evolution of cross-feeding in microbial populations. *The American naturalist*. 2004;163(6):E126–E135.
- [18] Barabas G, D'Andrea R, Ostling AM. Species packing in nonsmooth competition models. *Theoretical ecology*. 2013;6(1):1–19.
- [19] Barabas G, Meszner G. When the exception becomes the rule: the disappearance of limiting similarity in the Lotka–Volterra model. *Journal of theoretical biology*. 2009;258(1):89–94.
- [20] Coyte KZ, Schluter J, Foster KR. The ecology of the microbiome: Networks, competition, and stability. *Science*. 2015;350(6261):663–666.
- [21] Holling CS. The functional response of predators to prey density and its role in mimicry and population regulation. *The Memoirs of the Entomological Society of Canada*. 1965;97(S45):5–60.
- [22] Shores N, Hegreness M, Kishony R. Evolution exacerbates the paradox of the plankton. *Proceedings of the National Academy of Sciences*. 2008;105(34):12365–12369.
- [23] Saito MA, Goepfert TJ, Ritt JT. Some thoughts on the concept of colimitation: three definitions and the importance of bioavailability. *Limnology and Oceanography*. 2008;53(1):276–290.

- [24] De Baar H. von Liebig's law of the minimum and plankton ecology (1899–1991). *Progress in Oceanography*. 1994;33(4):347–386.
- [25] Embree M, Liu JK, Al-Bassam MM, Zengler K. Networks of energetic and metabolic interactions define dynamics in microbial communities. *Proceedings of the National Academy of Sciences*. 2015;112(50):15450–15455.
- [26] Grilli J, Adorisio M, Suweis S, Barabás G, Banavar JR, Allesina S, et al. Feasibility and coexistence of large ecological communities. *Nature Communications*. 2017;8:14389.
- [27] Hernández-García E, López C, Pigolotti S, Andersen KH. Species competition: coexistence, exclusion and clustering. *Philosophical Transactions of the Royal Society of London A: Mathematical, Physical and Engineering Sciences*. 2009;367(1901):3183–3195.
- [28] Rohr RP, et al. On the structural stability of mutualistic systems. *Science*. 2014;345:416–425.
- [29] Zelezniak A, Andrejev S, Ponomarova O, Mende DR, Bork P, Patil KR. Metabolic dependencies drive species co-occurrence in diverse microbial communities. *Proceedings of the National Academy of Sciences*. 2015;112(20):6449–6454.
- [30] Song H, Lee SY. Production of succinic acid by bacterial fermentation. *Enzyme and microbial technology*. 2006;39(3):352–361.
- [31] Saavedra S, Rohr RP, Bascompte J, Godoy O, Kraft NJB, Levine JM. A structural approach for understanding multispecies coexistence. *Ecological Monographs*. 2017;87(3):470–486.
- [32] Levine JM, Bascompte J, Adler PB, Allesina S. Beyond pairwise mechanisms of species coexistence in complex communities. *Nature*. 2017;546(7656):56.
- [33] Abrams PA, Rueffler C, Dinnage R. Competition-similarity relationships and the nonlinearity of competitive effects in consumer-resource systems. *The American Naturalist*. 2008;172(4):463–474.
- [34] Gourion D, Seeger A. Deterministic and stochastic methods for computing volumetric moduli of convex cones. *Computational & Applied Mathematics*. 2010;29(2):215–246.
- [35] Horn RA, Johnson CR. *Matrix Analysis*. 2nd ed. New York, NY, USA: Cambridge University Press; 2012.
